# Supplementary material for: OsHV-1 infection leads to mollusc tissue lesion and iron redistribution, revealing a strategy of iron limitation against pathogen
Source: Royal Society of Chemistry journal article supplement (doi:10.1039/c9mt00018f), 2019-02-21
Supplement: c9mt00018f1.pdf [file c9mt00018f1.pdf]

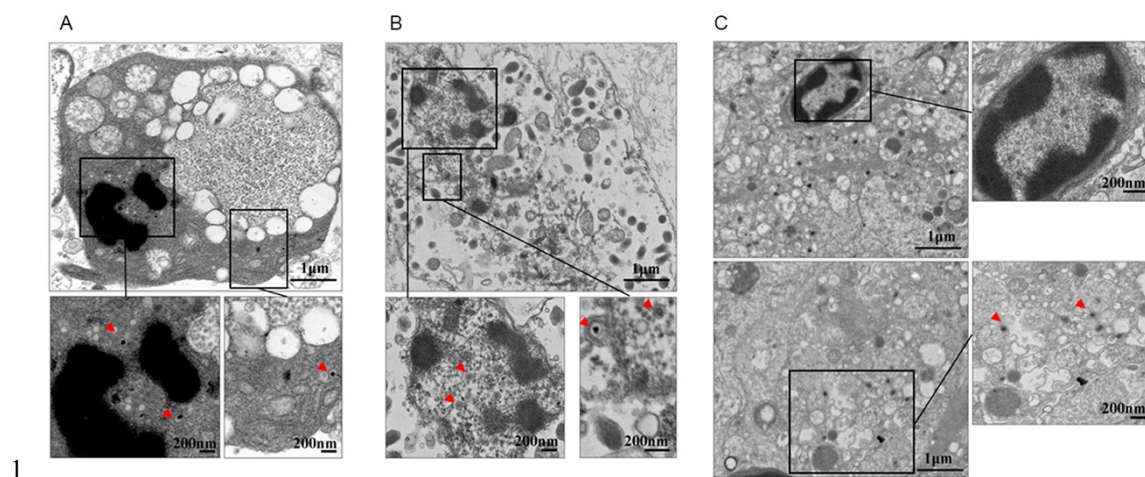

1  
2 Fig.S1. Transmission electron microscopy confirmation of OsHV-1 infection in ark  
3 clams. Tissues, (A) Hemocytes, (B) Mantle, (C) Hepatopancreas, were examined at 72  
4 hpi. Arrows indicate OsHV-1 particles.

5

6

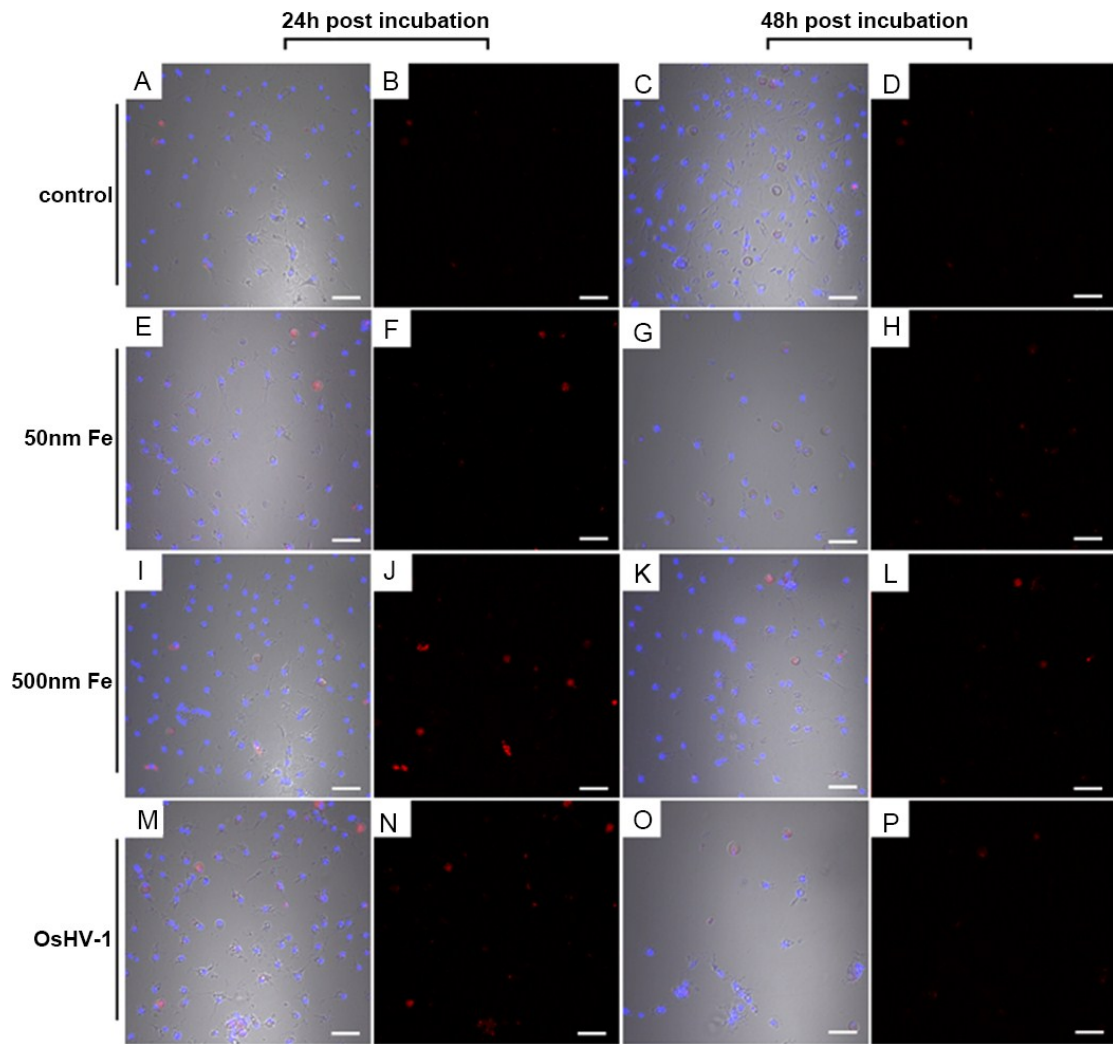

7

8 Fig.S2. ROS generation of in vitro hemocytes was promoted under incubation with high  
 9 level iron and OsHV-1. (A-D) Normal cultured hemocytes were set as the control  
 10 group. Few ROS signal (red) could be detected. (E-H), (I-L) Hemocytes under  
 11 incubation with supplemented 50 nm and 500 nm iron respectively. More ROS signal  
 12 (red) was found. The amount of adherent hemocytes decreased after 72 h incubation  
 13 with supplemented 50 nm and 500 nm iron. Hemocytes incubated with OsHV-1 also  
 14 showed more ROS signal (red) (M-P). (scale bar = 50  $\mu$ m).

15

16

17

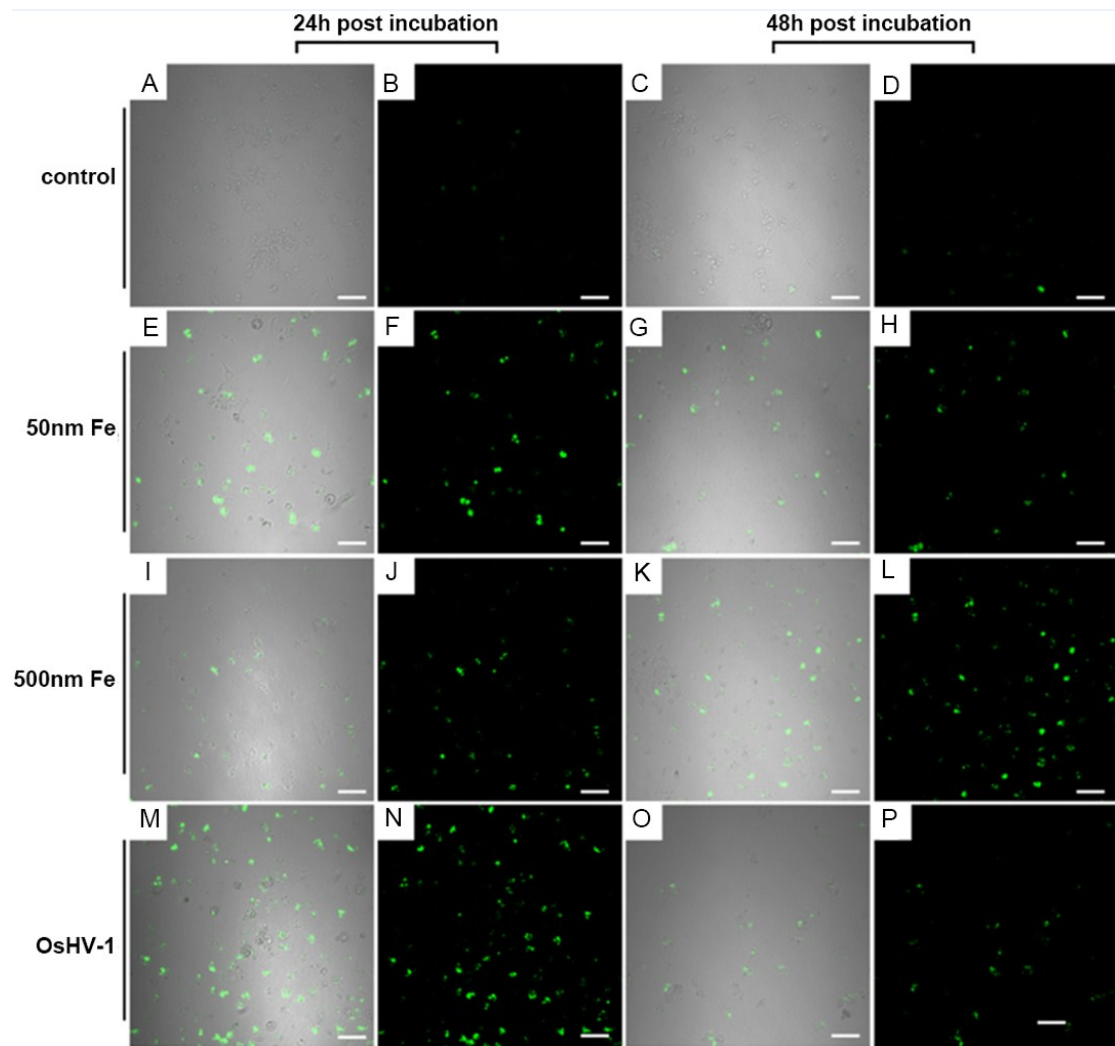

19

20 Fig.S3. Hemocyte death in vitro was induced under incubation with high level iron and  
 21 OsHV-1. (scale bar = 50  $\mu\text{m}$ ) (A-D) Normal cultured hemocytes were set as the control  
 22 group. Few dying hemocyte signal (green) was detected. The increase of dying  
 23 hemocyte signal (green) could be observed in (E-H), (I-L) Hemocytes under incubation  
 24 with supplemented 50 nm and 500 nm iron respectively; and in (M-P) Hemocytes  
 25 incubated with OsHV-1.

26

27

28 **The promotion of ROS and cell death by the incubation with high level iron and**  
29 **OsHV-1**

30 The fluorescent indicator 2',7'-dichlorofluorescein (DCF) was used to monitor the  
31 levels of intracellular ROS in hemocytes under supplement iron incubation and OsHV-1  
32 infection (Fig. S2). The results showed that the DCF fluorescence signals (red) were  
33 enhanced at 24 h under iron incubation with 50 nM and 500 nM supplement iron, and  
34 comparatively weakened from 24 h to 48 h with decreasing adherent hemocytes, which  
35 was similar to the results under OsHV-1 infection. TUNEL assay were undertaken to  
36 determine the effect of the incubation with supplementary iron and OsHV-1 on DNA  
37 damage in hemocytes (Fig. S3). The results showed that the positive signals (green)  
38 were promoted at 24 h under supplementary iron (50 nM and 500 nM) and OsHV-1  
39 incubation. From 24 h to 48 h, the positive signal also weakened as the adherent  
40 hemocytes decreasing.

41

42

43

44
